# Supplementary material
Source: publisher site journal article supplement (https://jmir.org/api/download?alt_name=derma_v3i1e10508_app3.docx&filename=66a6b4a173009fa7e673060cc9f7d408.docx)
Supplement: Supplementary file 1 [file download]

Checklist for Reporting Results of Internet E-Surveys (CHERRIES)

| 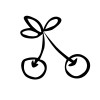 | **Checklist for Reporting Results of Internet E-Surveys (CHERRIES)** | |
| --- | --- | --- |
| ***Item Category*** | ***Checklist Item*** | ***Description*** |
| **Design** |  |  |
|  | Survey design is described in the protocol and the manuscript. Final response rates: of the 112-person sample frame, 70 participants completed stool specimens, for a response rate of 62.5%. | Describe target population, sample frame. The sample is a convenience sample since it was left up to each individual to choose to participate in the survey. |
| **IRB (Institutional Review Board) approval and informed consent process** |  |  |
|  | Application was submitted to MEBO Research Institutional Review Board (IRB) on March 6, 2018 and approved on May 11, 2018. Protocol #201805110018MEBO | The study has been approved by an IRB. |
|  | IRB-approved version of informed consent form that has been used to enroll participants is posted on clinicaltrials.gov. Participants were informed of all details, including contact information for PI and study coordinator. | Describe the informed consent process. Where were the participants told the length of time of the survey, which data were stored and where and for how long, who the investigator was, and the purpose of the study? |
|  | Data protection was ensured with password protection, encryption and versioning software, as well as limited access (no more than 2 to 4 long-term collaborators trained in human protection), and by comprehensive monitoring on all access activity to data. | If any personal information was collected or stored, describe what mechanisms were used to protect unauthorized access. |
| **Development and pre-testing** |  |  |
|  | Development and testing explained on page 5 of the manuscript | State how the survey was developed, including whether the usability and technical functionality of the electronic questionnaire had been tested before fielding the questionnaire. |
| **Recruitment process and description of the sample having access to the questionnaire** |  |  |
|  | We used open survey not a closed survey | An “open survey” is a survey open for each visitor of a site, while a closed survey is only open to a sample which the investigator knows (password-protected survey). |
|  | Initial contact with participants was made on the Internet (~2% of participants met the study coordinator in person in prior meetups, years before the study) | Indicate whether or not the initial contact with the potential participants was made on the Internet. (Investigators may also send out questionnaires by mail and allow for Web-based data entry.) |
|  | The survey was advertised on MEBO and Aurametrix blogs, Facebook and other support groups. The study was posted on clinicaltrials.gov thus attracting a few patient referrals from medical practitioners. | How/where was the survey announced or advertised? Some examples are offline media (newspapers), or online (mailing lists – If yes, which ones?) or banner ads (Where were these banner ads posted and what did they look like?). It is important to know the wording of the announcement as it will heavily influence who chooses to participate. Ideally the survey announcement should be published as an appendix. |
| **Survey administration** |  |  |
|  | e-Survey was Web-based | State the type of e-survey (eg, one posted on a Web site, or one sent out through e-mail). If it is an e-mail survey, were the responses entered manually into a database, or was there an automatic method for capturing responses? |
|  | The survey was created in Google forms. A link to the survey was posted on the MEBO Research website, Aurametrix website and support groups. Visitors of these non-commercial sites are normally looking for social support and help with their MEBO and PATM condition. | Describe the Web site (for mailing list/newsgroup) in which the survey was posted. What is the Web site about, who is visiting it, what are visitors normally looking for? Discuss to what degree the content of the Web site could pre-select the sample or influence the results. For example, a survey about vaccination on a anti-immunization Web site will have different results from a Web survey conducted on a government Web site |
|  | Survey and submission of samples was voluntary. | Was it a mandatory survey to be filled in by every visitor who wanted to enter the Web site, or was it a voluntary survey? |
|  | No incentives were offered | Were any incentives offered (eg, monetary, prizes, or non-monetary incentives such as an offer to provide the survey results)? |
|  | Consented individuals received their kits between June and December 2018, answered QoL questionnaire and sent stool samples for processing between June 2018 and July 2019. Final batch of sequencing data was received in October 2019. | In what timeframe were the data collected? |
|  | Items or questionnaires were not randomized | To prevent biases items can be randomized or alternated. |
|  | Adaptive questioning was not used. | Use adaptive questioning (certain items, or only conditionally displayed based on responses to other items) to reduce number and complexity of the questions. |
|  | Number of Items per page was 2-3 | What was the number of questionnaire items per page? The number of items is an important factor for the completion rate. |
|  | Number of screens (pages): 9 | Over how many pages was the questionnaire distributed? The number of items is an important factor for the completion rate. |
|  | Completeness check was done for the study consent or opt-out checkbox (one of the two had to be checked for submitting the form). MEBO ID and kit IDS were also required, but the participant could avoid providing it by typing something else. | It is technically possible to do consistency or completeness checks before the questionnaire is submitted. Was this done, and if “yes”, how (usually JAVAScript)? An alternative is to check for completeness after the questionnaire has been submitted (and highlight mandatory items). If this has been done, it should be reported. All items should provide a non-response option such as “not applicable” or “rather not say”, and selection of one response option should be enforced. |
|  | Responders were able to edit their answers or submit corrected answers later and e-mail study stuff asking them to remove their previous response. | State whether respondents were able to review and change their answers (eg, through a Back button or a Review step which displays a summary of the responses and asks the respondents if they are correct). |
| **Response rates** |  |  |
|  | We did not use any cookies and were not recording IP addresses. Unique responses were determined by valid kit IDs or contact information. | If you provide view rates or participation rates, you need to define how you determined a unique visitor. There are different techniques available, based on IP addresses or cookies or both. |
|  | Ratio of unique survey visitors/unique site visitors was over 25% | Requires counting unique visitors to the first page of the survey, divided by the number of unique site visitors (not page views!). It is not unusual to have view rates of less than 0.1 % if the survey is voluntary. |
|  | We can’t estimate “recruitment rate” based on web clicks. The ratio was close to 100%, since the survey site was not widely advertised and the only visitors were those who already made up their mind about participating. (Ratio of unique visitors who agreed to participate/unique first survey page visitors) | Count the unique number of people who filled in the first survey page (or agreed to participate, for example by checking a checkbox), divided by visitors who visit the first page of the survey (or the informed consents page, if present). This can also be called “recruitment” rate. |
|  | Completion rate was 62% (Ratio of users who finished the survey/users who agreed to participate) | The number of people submitting the last questionnaire page, divided by the number of people who agreed to participate (or submitted the first survey page). This is only relevant if there is a separate “informed consent” page or if the survey goes over several pages. This is a measure for attrition. Note that “completion” can involve leaving questionnaire items blank. This is not a measure for how completely questionnaires were filled in. (If you need a measure for this, use the word “completeness rate”.) |
| **Preventing multiple entries from the same individual** |  |  |
|  | Cookies were not used | Indicate whether cookies were used to assign a unique user identifier to each client computer. If so, mention the page on which the cookie was set and read, and how long the cookie was valid. Were duplicate entries avoided by preventing users access to the survey twice; or were duplicate database entries having the same user ID eliminated before analysis? In the latter case, which entries were kept for analysis (eg, the first entry or the most recent)? |
|  | IP check was not performed | Indicate whether the IP address of the client computer was used to identify potential duplicate entries from the same user. If so, mention the period of time for which no two entries from the same IP address were allowed (eg, 24 hours). Were duplicate entries avoided by preventing users with the same IP address access to the survey twice; or were duplicate database entries having the same IP address within a given period of time eliminated before analysis? If the latter, which entries were kept for analysis (eg, the first entry or the most recent)? |
|  | Log file analysis was not performed | Indicate whether other techniques to analyze the log file for identification of multiple entries were used. If so, please describe. |
|  | Since it was an open survey, there was no need in registration | In “closed” (non-open) surveys, users need to login first and it is easier to prevent duplicate entries from the same user. Describe how this was done. For example, was the survey never displayed a second time once the user had filled it in, or was the username stored together with the survey results and later eliminated? If the latter, which entries were kept for analysis (eg, the first entry or the most recent)? |
| **Analysis** |  |  |
|  | Handling of incomplete questionnaires | Were only completed questionnaires analyzed? Were questionnaires which terminated early (where, for example, users did not go through all questionnaire pages) also analyzed? |
|  | There were no answers submitted with an atypical timestamp | Some investigators may measure the time people needed to fill in a questionnaire and exclude questionnaires that were submitted too soon. Specify the timeframe that was used as a cut-off point, and describe how this point was determined. |
|  | No statistical correction methods such as weighting of items or propensity scores have been used to adjust for the non-representative samples. | Indicate whether any methods such as weighting of items or propensity scores have been used to adjust for the non-representative sample; if so, please describe the methods. |
